# Supplementary material
Source: Research Square preprint supplement (doi:10.21203/rs.3.rs-8555994/v1)
Supplement: Supplementary file 1 [file 79821eda0f97ef9a15738533.xlsx]

## Sheet: Sheet1
Sample name	gels and blots		2kb Marker
2kb Marker
16S-1-1
